# Supplementary material for: A Comprehensive Phylogenetic and Bioinformatics Survey of Lectins in the Fungal kingdom
Source: bioRxiv or medRxiv preprint supplement (doi:10.1101/2021.04.01.438069), 2021-04-03
Supplement: Supplementary file [file media-1.pdf]

## Supplementary data

### A Comprehensive Phylogenetic and Bioinformatics Survey of Lectins in the Fungal kingdom

Annie Lebreton, François Bonnardel, Yu-Cheng Dai, Anne Imberty, Francis M. Martin, Frédérique Lisacek

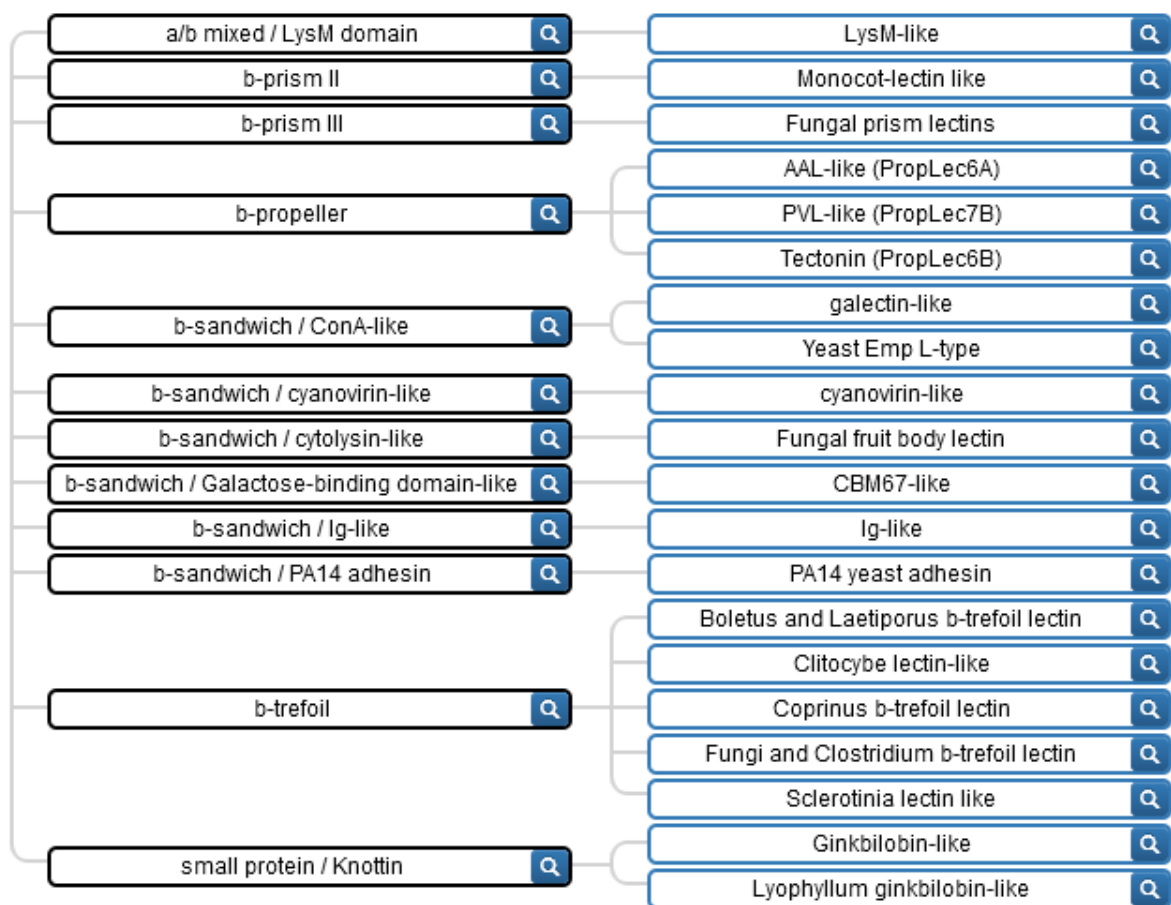

**Figure S1:** Distribution of lectin folds and classes of fungal lectin with 3D structures in Unilectin3D database.

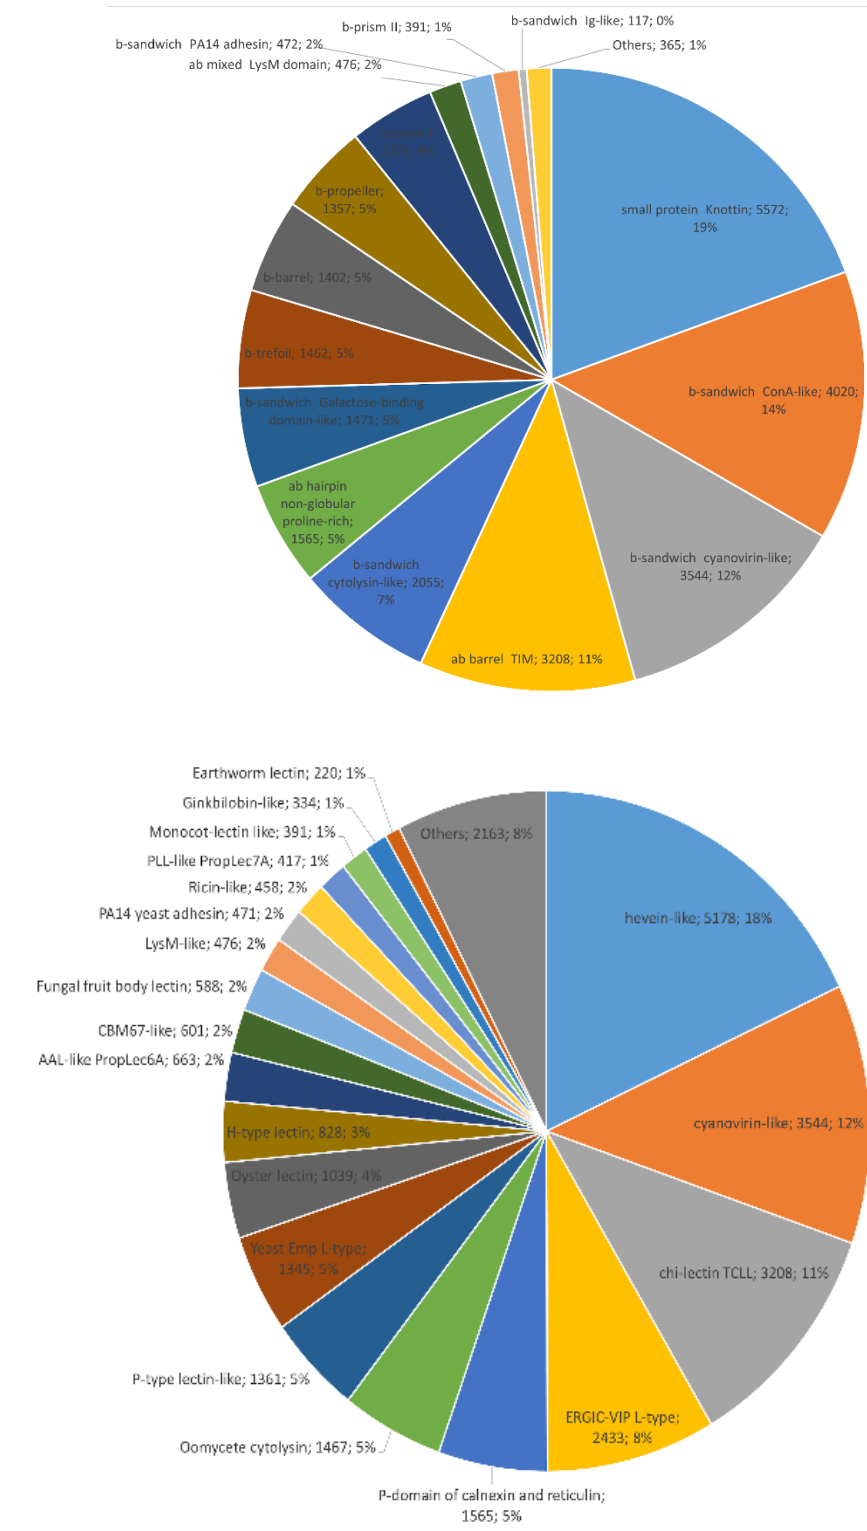

**Figure S2:** Distribution of folds (left) and classes (right) of predicted lectin sequences in MycoLec. Only lectin sequences with a similarity score > 25% were used.

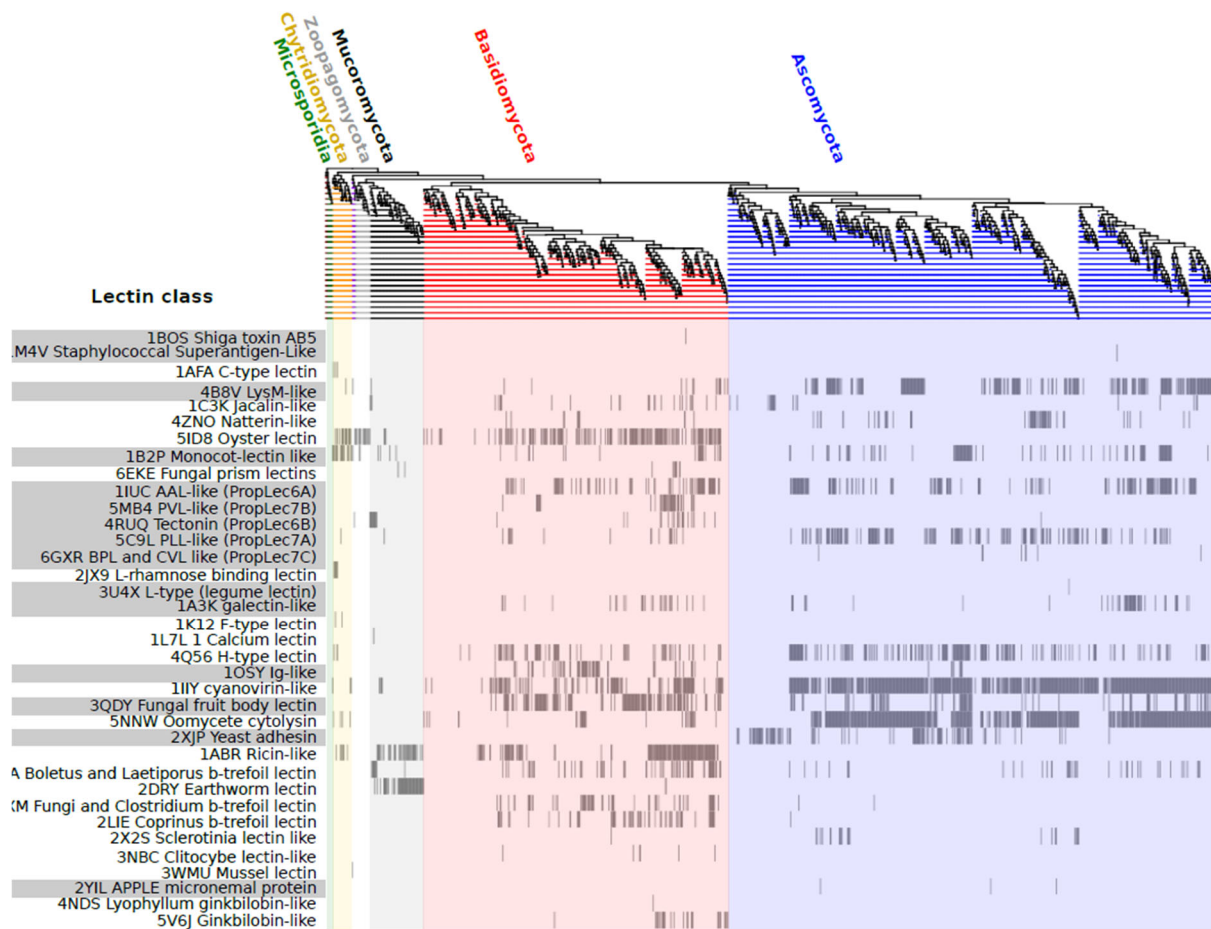

**Figure S3: Distribution of predicted lectins by species in MycoLec.** Each vertical line corresponds to a fungal strain organized according to their phylogenetic relationship as displayed by the tree. Left, Clustering of lectin classes. Lectins with a similarity score > 25% were used to detect the presence of the different lectin classes found in the MycoCosm genomes.

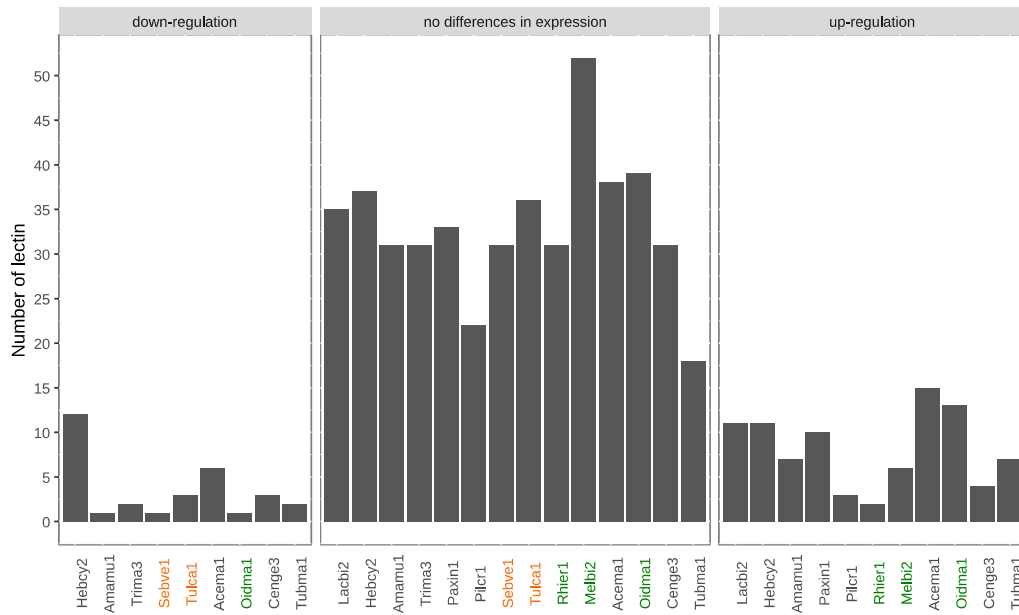

**Figure S4: Impact of mycorrhization of 14 fungal strains with their corresponding host plant on lectin expression.** Each bar corresponds to a strain annotated by a tag used in the MycoCosm database to refer to the specific strain and genomic assembly. Tags are colored according to the mycorrhizae type: grey ectomycorrhizae, green ericoid mycorrhizae, orange orchid mycorrhizae.

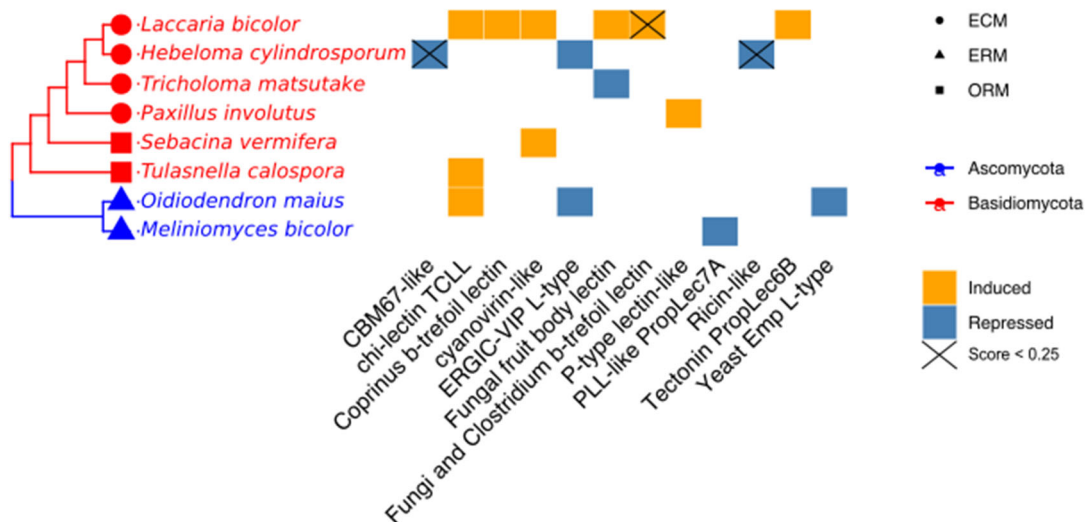

**Figure S5: Differential expression of lectins within mycorrhizal fungi upon plants interaction.** Lectins with invariable expression are not represented. Three species are ericoid mycorrhizae (ERM), two are orchids mycorrhizae (ORM) and the other are ectomycorrhizae (ECM).

**Table S1: Fungal species investigated in the exploration of the lectins induced and repressed during their mycorrhization with a compatible plant host.** ECM: ectomycorrhizae, ORM: orchids mycorrhizae, ERM: ericoid mycorrhizae

| JGI ID | Fungal species                    | Plant host                         | Analysis Method | Mycorrhizae type | Ref |
|--------|-----------------------------------|------------------------------------|-----------------|------------------|-----|
| Amamu1 | <i>Amanita muscaria</i>           | <i>Populus tremula tremoloides</i> | CLC             | ECM              | 1   |
| Hebcy2 | <i>Hebeloma cylindrosporum</i>    | <i>Pinus pinaster</i>              | CLC             | ECM              | 1   |
| Paxin1 | <i>Paxillus involutus</i>         | <i>Fagus sylvatica</i>             | CLC             | ECM              | 1   |
| Pilcr1 | <i>Piloderma croeus</i>           | <i>Quercus robur</i>               | CLC             | ECM              | 1   |
| Oidma1 | <i>Oidiodendron maius</i>         | <i>Vaccinium myrtillus</i>         | CLC             | ERM              | 1   |
| Sebve1 | <i>Sebacina vermifera</i>         | <i>Arabidopsis thaliana</i>        | CLC             | ORM              | 1   |
| Tulca1 | <i>Tulasnella calosporra</i>      | <i>Serapias vomeracea</i>          | CLC             | ORM              | 1   |
| Melbi2 | <i>Meliniomyces bicolor</i>       | <i>Vaccinium myrtillus</i>         | CLC             | ERM              | 2   |
| Rhier1 | <i>Rhizoscyphus ericaceae</i>     | <i>Vaccinium myrtillus</i>         | CLC             | ERM              | 2   |
| Tubma1 | <i>Tuber magnatum</i>             | <i>Quercus robur</i>               | CLC             | ECM              | 3   |
| Cenge3 | <i>Cenococcum geophilum</i>       | <i>Pinus sylvestris</i>            | CLC             | ECM              | 4   |
| Acema1 | <i>Acephala macrosclerotiorum</i> | <i>Pinus sylvestris</i>            | HISAT/ DESeq2   | ECM              | 5   |
| Lacbi2 | <i>Laccaria bicolor</i>           | <i>Populus tremula x alba</i>      | HISAT/DESeq2    | ECM              | 6   |
| Trima3 | <i>Tricholoma matsutake</i>       | <i>Pinus sylvestris</i>            | CLC             | ECM              | 5   |

**Table S2: Lectin content in the predicted proteomes of the Agaricomycetes fungal class sorted by ecological niche.**



|                                   |   |   |    |   |   |    |    |    |   |   |   |   |   |    |    |    |    |          |
|-----------------------------------|---|---|----|---|---|----|----|----|---|---|---|---|---|----|----|----|----|----------|
| <i>Gymnopus androsaceus</i>       | 1 |   | 2  |   |   | 5  | 1  | 1  | 3 |   |   | 1 | 6 | 20 | 8  |    |    |          |
| <i>Gymnopus luxurians</i>         |   | 7 |    |   |   | 1  | 10 | 3  | 6 |   |   | 1 | 1 | 4  | 33 | 8  |    |          |
| <i>Leucoagaricus</i>              |   |   |    |   |   |    |    |    |   |   |   |   |   |    |    |    |    |          |
| <i>gongylophorus</i>              |   |   |    |   |   |    |    |    |   |   |   |   | 1 | 1  | 1  |    |    |          |
| <i>Marasmius fiardii</i>          |   | 2 | 3  | 5 |   | 1  |    |    |   |   |   | 4 | 3 | 18 | 6  |    |    |          |
| <i>Mycena galopus</i>             | 5 |   | 5  | 2 |   | 19 | 1  | 16 | 2 | 1 | 1 | 2 | 1 | 3  | 8  | 5  | 71 | 14       |
| <i>Polyporus arcularius</i>       |   |   |    |   |   |    |    | 1  |   | 2 |   |   | 1 | 1  | 5  | 4  |    |          |
| <i>Psilocybe serbica</i>          |   | 2 | 2  | 2 |   | 4  | 4  | 2  | 1 | 1 | 1 | 3 | 1 | 4  | 1  | 28 | 13 |          |
| <i>Pterula gracilis</i>           |   |   | 1  |   |   | 1  | 2  | 1  | 1 |   | 1 |   |   |    | 7  | 6  |    |          |
| <i>Sphaerobolus stellatus</i>     |   |   | 2  | 7 |   | 9  | 4  | 1  |   | 1 | 8 | 3 | 1 | 3  | 1  | 40 | 11 |          |
| <b>Generalist decayer</b>         |   |   |    |   |   |    |    |    |   |   |   |   |   |    |    |    |    | <b>0</b> |
| <i>Pleurotus ostreatus</i>        | 2 |   |    |   |   | 3  | 2  | 4  |   |   |   | 1 | 1 | 1  | 14 | 7  |    |          |
| <i>Rhodospodium toruloides</i>    |   |   |    |   |   | 1  |    |    |   |   |   |   |   |    | 1  | 1  |    |          |
| <i>Serpula lacrymans</i>          |   |   | 1  |   |   | 2  |    |    |   |   |   | 1 | 3 | 7  | 4  |    |    |          |
| <b>Wood decayer</b>               |   |   |    |   |   |    |    |    |   |   |   |   |   |    |    |    |    | <b>0</b> |
| <i>Auricularia subglabra</i>      |   |   |    |   |   | 17 | 4  | 5  | 1 | 1 | 1 |   |   | 1  | 30 | 7  |    |          |
| <i>Auriculariopsis ampla</i>      |   |   | 1  |   |   | 1  |    |    |   |   |   |   | 3 | 5  | 3  |    |    |          |
| <i>Bjerkandera adusta</i>         |   |   | 6  |   |   | 1  | 1  | 7  | 2 | 1 |   | 1 |   | 19 | 7  |    |    |          |
| <i>Clavulina sp./Sistotrema</i>   |   |   |    |   |   | 1  | 1  |    |   |   | 1 | 2 |   | 5  | 4  |    |    |          |
| <i>Coniophora olivacea</i>        |   |   |    |   |   | 1  | 2  | 2  |   |   | 1 |   |   | 6  | 4  |    |    |          |
| <i>Coniophora puteana</i>         |   |   |    |   |   | 1  | 1  |    |   |   | 1 |   |   | 3  | 3  |    |    |          |
| <i>Crucibulum laeve</i>           |   |   | 1  |   |   | 1  | 3  | 3  |   | 1 |   |   | 2 | 9  | 20 | 7  |    |          |
| <i>Cylindrobasidium torrendii</i> | 1 |   |    |   |   |    | 1  |    |   |   |   |   |   | 2  | 2  |    |    |          |
| <i>Dentipellis sp.</i>            |   |   |    |   |   | 1  | 3  | 3  |   | 1 |   |   |   | 8  | 4  |    |    |          |
| <i>Dichomitus squalens</i>        | 3 |   |    |   |   | 1  | 1  |    | 3 | 4 | 1 |   |   | 13 | 6  |    |    |          |
| <i>Exidia glandulosa</i>          |   |   |    |   |   | 20 | 2  | 1  | 1 | 1 |   |   | 3 | 3  | 31 | 7  |    |          |
| <i>Fibroporia radiculosa</i>      |   |   |    |   |   | 1  |    |    |   | 1 |   |   | 1 | 3  | 3  |    |    |          |
| <i>Fistulina hepatica</i>         |   |   |    |   |   | 1  |    |    |   |   |   |   |   | 1  | 1  |    |    |          |
| <i>Fomitopsis pinicola</i>        |   |   |    |   |   | 1  |    |    |   | 1 | 2 |   |   | 4  | 3  |    |    |          |
| <i>Galerina marginata</i>         |   |   | 2  | 2 | 1 | 6  | 1  | 7  |   | 1 |   |   | 1 | 6  | 1  | 28 | 10 |          |
| <i>Ganoderma sp.</i>              |   |   |    |   |   | 1  |    | 1  | 1 |   |   |   |   | 3  | 3  |    |    |          |
| <i>Gloeophyllum trabeum</i>       |   |   |    |   |   | 2  |    |    |   |   |   |   |   | 2  | 1  |    |    |          |
| <i>Heliocybe sulcata</i>          |   |   |    |   |   | 1  | 1  |    |   |   |   |   |   | 2  | 2  |    |    |          |
| <i>Hypholoma sublateritium</i>    |   | 1 | 1  |   |   | 5  | 1  | 3  | 1 | 1 |   |   | 1 | 14 | 8  |    |    |          |
| <i>Lentinellus vulpinus</i>       |   | 1 |    |   |   | 1  |    |    | 1 | 1 |   | 3 |   | 7  | 5  |    |    |          |
| <i>Lentinula edodes</i>           | 1 |   |    |   |   |    |    |    |   |   |   |   | 1 | 2  | 2  |    |    |          |
| <i>Lentinus tigrinus</i>          |   |   |    |   |   |    | 1  | 2  |   |   | 1 |   |   | 4  | 3  |    |    |          |
| <i>Neolentinus lepideus</i>       |   |   |    |   |   | 1  |    |    |   |   |   |   |   | 1  | 1  |    |    |          |
| <i>Obba rivulosa</i>              | 4 | 1 |    |   |   | 1  |    |    | 2 |   |   |   |   | 8  | 4  |    |    |          |
| <i>Omphalotus olearius</i>        |   |   |    |   |   |    |    | 1  | 1 |   |   |   |   | 2  | 2  |    |    |          |
| <i>Peniophora sp.</i>             |   | 1 |    |   |   | 2  |    |    |   | 2 |   | 5 | 2 | 12 | 5  |    |    |          |
| <i>Phanerochaete carnosa</i>      |   |   | 2  |   |   |    | 2  | 6  |   |   |   |   |   | 10 | 3  |    |    |          |
| <i>Phanerochaete</i>              |   |   |    |   |   |    |    |    |   |   |   |   |   |    |    |    |    |          |
| <i>chrysosporium</i>              |   |   | 6  |   |   | 1  | 2  | 1  |   |   |   |   |   | 10 | 4  |    |    |          |
| <i>Phlebia brevispora</i>         |   |   | 1  |   |   | 1  | 1  | 2  | 2 | 1 |   | 2 | 7 | 2  | 19 | 9  |    |          |
| <i>Phlebia centrifuga</i>         |   |   |    |   |   | 3  | 1  | 6  |   |   |   |   |   | 10 | 3  |    |    |          |
| <i>Phlebia radiata</i>            |   |   | 3  | 1 |   | 1  | 8  | 1  |   |   |   | 7 | 9 | 2  | 32 | 8  |    |          |
| <i>Phlebiopsis gigantea</i>       |   |   | 4  |   |   | 1  | 1  | 2  |   | 1 |   |   |   | 9  | 5  |    |    |          |
| <i>Plicaturopsis crispa</i>       |   |   |    |   |   | 1  |    |    |   |   |   | 1 |   | 2  | 2  |    |    |          |
| <i>Pluteus cervinus</i>           | 1 |   | 38 | 1 |   | 1  | 1  | 1  | 1 |   |   | 3 | 2 | 48 | 8  |    |    |          |
| <i>Polyporus brumalis</i>         |   |   |    |   |   |    |    | 1  | 1 |   |   | 1 | 1 | 4  | 4  |    |    |          |
| <i>Postia placenta</i>            | 1 |   |    |   |   | 1  | 3  | 4  | 2 | 2 | 7 | 3 |   | 23 | 8  |    |    |          |
| <i>Punctularia strigosozonata</i> |   |   |    |   |   |    | 3  | 1  |   |   |   |   |   | 4  | 2  |    |    |          |
| <i>Pycnoporus cinnabarinus</i>    |   |   |    |   |   | 1  |    |    |   |   |   | 1 |   | 2  | 2  |    |    |          |
| <i>Ramaria rubella</i>            | 1 |   | 1  | 3 |   |    |    |    |   |   |   |   | 2 | 7  | 4  |    |    |          |

|                                    |          |    |    |    |    |     |    |    |     |     |    |     |     |     |    |     |     |     |     |     |     |    |     |     |     |     |      |    |
|------------------------------------|----------|----|----|----|----|-----|----|----|-----|-----|----|-----|-----|-----|----|-----|-----|-----|-----|-----|-----|----|-----|-----|-----|-----|------|----|
| <i>Schizophyllum commune</i>       | 1        | 2  |    |    |    |     |    |    |     | 1   |    |     |     |     |    |     |     |     |     | 3   |     |    |     | 7   | 4   |     |      |    |
| <i>Schizopora paradoxa</i>         | 2        |    |    |    |    |     |    |    |     | 1   | 6  | 1   |     |     | 1  | 1   |     |     |     |     |     |    | 1   | 13  | 7   |     |      |    |
| <i>Serpula himantioides</i>        |          | 1  |    |    |    |     |    |    |     |     | 3  |     |     |     |    |     |     |     |     | 3   | 1   |    |     | 8   | 4   |     |      |    |
| <i>Stereum hirsutum</i>            |          |    |    |    |    |     |    |    |     | 1   | 1  |     |     | 1   |    |     |     |     |     |     |     |    |     | 3   | 3   |     |      |    |
| <i>Trametes pubescens</i>          |          |    |    |    |    |     |    |    |     |     |    |     |     |     | 2  |     |     |     |     |     |     |    | 2   | 4   | 2   |     |      |    |
| <i>Trametes versicolor</i>         |          |    |    |    |    |     |    |    |     |     |    |     |     |     | 1  |     |     |     |     |     |     |    | 2   | 3   | 2   |     |      |    |
| <b>Plant pathogen/Wood decayer</b> | <b>0</b> |    |    |    |    |     |    |    |     |     |    |     |     |     |    |     |     |     |     |     |     |    |     |     |     |     |      |    |
| <i>Armillaria cepistipes</i>       |          |    |    |    |    |     |    |    |     |     |    |     |     |     | 16 |     | 1   | 4   | 2   | 1   |     |    |     | 26  | 6   |     |      |    |
| <i>Armillaria gallica</i>          |          |    |    |    |    |     |    |    |     |     |    |     |     |     | 16 |     | 1   | 3   | 3   | 1   |     |    |     | 27  | 6   |     |      |    |
| <i>Fomitiporia mediterranea</i>    |          |    |    |    |    |     |    |    |     | 1   |    |     |     |     |    |     |     | 2   |     |     |     |    |     | 3   | 2   |     |      |    |
| <i>Laetiporus sulphureus</i>       |          |    |    |    |    |     |    |    |     |     |    |     |     |     |    |     |     | 2   |     |     |     |    |     | 5   | 4   |     |      |    |
| <b>Plant pathogen</b>              | <b>0</b> |    |    |    |    |     |    |    |     |     |    |     |     |     |    |     |     |     |     |     |     |    |     |     |     |     |      |    |
| <i>Armillaria mellea</i>           |          | 1  |    |    |    |     |    |    |     |     |    |     |     |     | 1  |     | 3   | 5   | 2   | 1   |     |    |     | 14  | 7   |     |      |    |
| <i>Armillaria ostoyae</i>          |          |    |    |    |    |     |    |    |     |     |    |     |     |     | 16 |     | 2   | 3   | 2   |     |     |    |     | 25  | 5   |     |      |    |
| <i>Armillaria solidipes</i>        |          | 1  |    |    |    |     |    |    |     |     |    |     |     |     | 17 |     | 1   | 4   | 1   |     |     |    |     | 26  | 6   |     |      |    |
| <i>Heterobasidion annosum</i>      |          |    |    |    |    |     |    |    |     | 1   |    |     |     |     | 2  |     |     |     |     |     |     |    |     | 3   | 2   |     |      |    |
| <i>Moniliophthora perniciosa</i>   |          | 1  |    |    |    |     |    |    |     |     |    |     |     |     |    |     |     |     |     |     |     |    |     | 4   | 2   |     |      |    |
| <i>Rhizoctonia solani</i>          |          | 1  |    |    |    |     |    |    |     |     |    |     |     |     | 8  |     |     | 3   |     | 4   | 3   | 3  |     | 22  | 6   |     |      |    |
| <i>Wolfiporia cocos</i>            |          |    |    |    |    |     |    |    |     |     |    |     |     |     | 1  |     |     | 1   |     |     |     |    |     | 2   | 2   |     |      |    |
|                                    |          |    |    |    |    |     |    |    |     |     |    |     |     |     | 10 |     |     |     |     |     |     |    |     |     | 13  |     |      |    |
| <b>Overall total</b>               | 12       | 8  | 13 | 16 | 3  | 9   | 18 | 34 | 42  | 33  | 9  | 32  | 8   | 1   | 10 | 0   | 7   | 29  | 32  | 56  | 85  | 7  | 38  | 51  | 71  | 25  | 12   | 31 |
| <b>Number of species</b>           | 4        | 7  | 5  | 8  | 2  | 32  | 5  | 10 | 11  | 15  | 3  | 31  | 44  | 53  | 8  | 20  | 36  | 19  | 22  | 25  | 27  | 5  | 22  | 24  | 15  | 14  | 5    | 10 |
| <b>% species</b>                   | 4%       | 7% | 5% | 7% | 2% | 30% | 5% | 9% | 10% | 14% | 3% | 29% | 41% | 50% | 7% | 19% | 34% | 18% | 21% | 23% | 25% | 5% | 21% | 22% | 14% | 13% | 100% |    |



**Table S3 : Details of lectins identified in the genome of *Laccaria bicolor***

| Lectin class                                   | # | Mycosm AC (score)                                                    | NCBI AC        | Protein name                                           |
|------------------------------------------------|---|----------------------------------------------------------------------|----------------|--------------------------------------------------------|
| Tectonin PropLec6B                             | 3 | Lacbi2:399271 (0.73)<br>Lacbi2:399270 (0.67)<br>Lacbi2:322629 (0.27) | XP_001876432.1 | tectonin 2                                             |
| Coprinus $\beta$ -trefoil lectin               | 3 | Lacbi2:330799 (0.48)<br>Lacbi2:327918 (0.42)<br>Lacbi2:691792 (0.25) | XP_001885184.1 | predicted protein [ <i>Laccaria bicolor</i> S238N-H82] |
| Galectin like                                  | 2 | Lacbi2:236913 (0.36)<br>Lacbi2:312069 (0.35)                         | XP_001883510.1 | galectin [ <i>Laccaria bicolor</i> S238N-H82]          |
| Physarium lectin                               | 2 | Lacbi2:381649 (0.39)<br>Lacbi2:322629 (0.39)                         | XP_001875654.1 | ricin-containing lipase tectonin-like                  |
| Oyster lectin                                  | 2 | Lacbi2:585014 (0.28)<br>Lacbi2:448672 (0.27)                         | XP_001880964.1 | predicted protein [ <i>Laccaria bicolor</i> S238N-H82] |
| Fungal fruit body lectin                       | 1 | Lacbi2:185716 (0.54)                                                 | XP_001885326.1 | predicted protein, partial                             |
| Boletus and Laetiporus $\beta$ -trefoil lectin | 1 | Lacbi2:318163 (0.30)                                                 | XP_001879265.1 | predicted protein [ <i>Laccaria bicolor</i> S238N-H82] |
| Cyanovirin like                                | 1 | Lacbi2:327824 (0.42)                                                 | XP_001881773.1 | predicted protein [ <i>Laccaria bicolor</i> S238N-H82] |
| P domain of calnexin and reticulon             | 1 | Lacbi2:399410 (0.50)                                                 | XP_001874124.1 | calnexin [ <i>Laccaria bicolor</i> S238N-H82]          |
| Ergic vip L type                               | 1 | Lacbi2:399414 (0.48)                                                 | XP_001888824.1 | ERGIC53, mannose lectin                                |
| P-type lectin like                             | 1 | Lacbi2:642707 (0.29)                                                 | XP_001874815.1 | predicted protein [ <i>Laccaria bicolor</i> S238N-H82] |
| PVL like PropLec7B                             | 1 | Lacbi2:692684 (0.67)                                                 | XP_001891161.1 | predicted protein, partial                             |

## References

- 1 Kohler, A. *et al.* Convergent losses of decay mechanisms and rapid turnover of symbiosis genes in mycorrhizal mutualists. *Nat. Genet.* **47**, 410-415 (2015).
- 2 Martino, E. *et al.* Comparative genomics and transcriptomics depict ericoid mycorrhizal fungi as versatile saprotrophs and plant mutualists. *New Phytol.* **217**, 1213-1229 (2018).
- 3 Murat, C. *et al.* Pezizomycetes genomes reveal the molecular basis of ectomycorrhizal truffle lifestyle. *Nat. Ecol. Evol.* **2**, 1956-1965 (2018).
- 4 Peter, M. *et al.* Ectomycorrhizal ecology is imprinted in the genome of the dominant symbiotic fungus *Cenococcum geophilum*. *Nat. Commun.* **7**, 12662 (2016).
- 5 Miyauchi, S. *et al.* Large-scale genome sequencing of mycorrhizal fungi provides insights into the early evolution of symbiotic traits. *Nat. Commun.* **11**, 5125 (2020).
- 6 Basso, V. *et al.* An ectomycorrhizal fungus alters sensitivity to jasmonate, salicylate, gibberellin, and ethylene in host roots. *Plant Cell Environ* **43**, 1047-1068 (2020).
